# Supplementary material
Source: publisher figshare collection journal article supplement (https://springernature.figshare.com/ndownloader/files/28130910)
Supplement: Supplementary file 1 [file 28130910]

datetime	id	value
1593572400	2	0.017
1593572400	3	0.037
1593572400	5	0.021
1593572400	6	0.002
1593572400	9	0.033
1593573300	2	0.022
1593573300	3	0.037
1593573300	5	0.022
1593573300	6	0.002
1593573300	9	0.006
1593574200	2	0.01
1593574200	3	0.036
1593574200	5	0.002
1593574200	6	0.001
1593574200	9	0.01
1593575100	2	0.017
1593575100	3	0.037
1593575100	5	0.001
1593575100	6	0.002
1593575100	9	0.022
1593576000	2	0.021
1593576000	3	0.037
1593576000	5	0.023
1593576000	6	0.001
1593576000	9	0.0
1593576900	2	0.009
1593576900	3	0.036
1593576900	5	0.02
1593576900	6	0.002
1593576900	9	0.055
1593577800	2	0.018
1593577800	3	0.037
1593577800	5	0.002
1593577800	6	0.003
1593577800	9	0.016
1593578700	2	0.021
1593578700	3	0.037
1593578700	5	0.001
1593578700	6	0.002
1593578700	9	0.0
1593579600	2	0.008
1593579600	3	0.037
1593579600	5	0.022
1593579600	6	0.003
1593579600	9	0.026
1593580500	2	0.019
1593580500	3	0.036
1593580500	5	0.021
1593580500	6	0.001
1593580500	9	0.0
1593581400	2	0.02
1593581400	3	0.036
1593581400	5	0.002
1593581400	6	0.002
1593581400	9	0.0
1593582300	2	0.007
1593582300	3	0.037
1593582300	5	0.011
1593582300	6	0.002
1593582300	9	0.027
1593583200	2	0.02
1593583200	3	0.036
1593583200	5	0.006
1593583200	6	0.001
1593583200	9	0.0
1593584100	2	0.021
1593584100	3	0.037
1593584100	5	0.026
1593584100	6	0.002
1593584100	9	0.003
1593585000	2	0.005
1593585000	3	0.036
1593585000	5	0.002
1593585000	6	0.002
1593585000	9	0.055
1593585900	2	0.021
1593585900	3	0.036
1593585900	5	0.016
1593585900	6	0.001
1593585900	9	0.014
1593586800	2	0.019
1593586800	3	0.036
1593586800	5	0.001
1593586800	6	0.002
1593586800	9	0.013
1593587700	2	0.006
1593587700	3	0.036
1593587700	5	0.026
1593587700	6	0.001
1593587700	9	0.014
1593588600	2	0.02
1593588600	3	0.036
1593588600	5	0.011
1593588600	6	0.002
1593588600	9	0.0
1593589500	2	0.018
1593589500	3	0.036
1593589500	5	0.006
1593589500	6	0.001
1593589500	9	0.021
1593590400	2	0.008
1593590400	3	0.037
1593590400	5	0.001
1593590400	6	0.002
1593590400	9	0.006
1593591300	2	0.02
1593591300	3	0.036
1593591300	5	0.021
1593591300	6	0.001
1593591300	9	0.0
1593592200	2	0.014
1593592200	3	0.036
1593592200	5	0.02
1593592200	6	0.002
1593592200	9	0.028
1593593100	2	0.151
1593593100	3	0.037
1593593100	5	0.001
1593593100	6	0.002
1593593100	9	0.015
1593594000	2	0.195
1593594000	3	0.036
1593594000	5	0.002
1593594000	6	0.002
1593594000	9	0.03
1593594900	2	0.186
1593594900	3	0.036
1593594900	5	0.029
1593594900	6	0.003
1593594900	9	0.027
1593595800	2	0.193
1593595800	3	0.036
1593595800	5	0.014
1593595800	6	0.002
1593595800	9	0.0
1593596700	2	0.2
1593596700	3	0.037
1593596700	5	0.001
1593596700	6	0.002
1593596700	9	0.0
1593597600	2	0.187
1593597600	3	0.035
1593597600	5	0.002
1593597600	6	0.003
1593597600	9	0.027
1593598500	2	0.197
1593598500	3	0.037
1593598500	5	0.024
1593598500	6	0.014
1593598500	9	0.0
1593599400	2	0.197
1593599400	3	0.036
1593599400	5	0.012
1593599400	6	0.044
1593599400	9	0.158
1593600300	2	0.181
1593600300	3	0.036
1593600300	5	0.003
1593600300	6	0.047
1593600300	9	0.448
1593601200	2	0.248
1593601200	3	0.005
1593601200	5	0.009
1593601200	6	0.049
1593601200	9	0.107
1593602100	2	0.169
1593602100	3	0.0
1593602100	5	0.031
1593602100	6	0.042
1593602100	9	0.036
1593603000	2	0.009
1593603000	3	0.0
1593603000	5	0.005
1593603000	6	0.029
1593603000	9	0.037
1593603900	2	0.019
1593603900	3	0.0
1593603900	5	0.002
1593603900	6	0.019
1593603900	9	0.097
1593604800	2	0.009
1593604800	3	0.0
1593604800	5	0.016
1593604800	6	0.002
1593604800	9	0.21
1593605700	2	0.015
1593605700	3	0.0
1593605700	5	0.018
1593605700	6	0.04
1593605700	9	0.182
1593606600	2	0.018
1593606600	3	0.0
1593606600	5	0.009
1593606600	6	0.04
1593606600	9	0.056
1593607500	2	0.005
1593607500	3	0.0
1593607500	5	0.002
1593607500	6	0.039
1593607500	9	0.068
1593608400	2	0.017
1593608400	3	0.0
1593608400	5	0.014
1593608400	6	0.006
1593608400	9	0.026
1593609300	2	0.015
1593609300	3	0.0
1593609300	5	0.046
1593609300	6	0.001
1593609300	9	0.041
1593610200	2	0.007
1593610200	3	0.0
1593610200	5	0.001
1593610200	6	0.001
1593610200	9	0.058
1593611100	2	0.017
1593611100	3	0.0
1593611100	5	0.001
1593611100	6	0.001
1593611100	9	0.059
1593612000	2	0.007
1593612000	3	0.0
1593612000	5	0.002
1593612000	6	0.001
1593612000	9	0.016
1593612900	2	0.014
1593612900	3	0.0
1593612900	5	0.022
1593612900	6	0.001
1593612900	9	0.014
1593613800	2	0.017
1593613800	3	0.0
1593613800	5	0.005
1593613800	6	0.003
1593613800	9	0.007
1593614700	2	0.004
1593614700	3	0.0
1593614700	5	0.001
1593614700	6	0.002
1593614700	9	0.028
1593615600	2	0.017
1593615600	3	0.0
1593615600	5	0.002
1593615600	6	0.001
1593615600	9	0.001
1593616500	2	0.012
1593616500	3	0.0
1593616500	5	0.021
1593616500	6	0.001
1593616500	9	0.004
1593617400	2	0.009
1593617400	3	0.0
1593617400	5	0.008
1593617400	6	0.001
1593617400	9	0.025
1593618300	2	0.027
1593618300	3	0.0
1593618300	5	0.003
1593618300	6	0.001
1593618300	9	0.0
1593619200	2	0.035
1593619200	3	0.0
1593619200	5	0.003
1593619200	6	0.001
1593619200	9	0.037
1593620100	2	0.045
1593620100	3	0.0
1593620100	5	0.021
1593620100	6	0.001
1593620100	9	0.037
1593621000	2	0.046
1593621000	3	0.0
1593621000	5	0.001
1593621000	6	0.001
1593621000	9	0.0
1593621900	2	0.033
1593621900	3	0.0
1593621900	5	0.002
1593621900	6	0.002
1593621900	9	0.026
1593622800	2	0.046
1593622800	3	0.0
1593622800	5	0.009
1593622800	6	0.001
1593622800	9	0.001
1593623700	2	0.039
1593623700	3	0.0
1593623700	5	0.014
1593623700	6	0.001
1593623700	9	0.0
1593624600	2	0.038
1593624600	3	0.0
1593624600	5	0.006
1593624600	6	0.001
1593624600	9	0.029
1593625500	2	0.053
1593625500	3	0.0
1593625500	5	0.024
1593625500	6	0.001
1593625500	9	0.0
1593626400	2	0.065
1593626400	3	0.0
1593626400	5	0.043
1593626400	6	0.001
1593626400	9	0.02
1593627300	2	0.065
1593627300	3	0.0
1593627300	5	0.011
1593627300	6	0.001
1593627300	9	0.03
1593628200	2	0.052
1593628200	3	0.0
1593628200	5	0.015
1593628200	6	0.001
1593628200	9	0.053
1593629100	2	0.067
1593629100	3	0.0
1593629100	5	0.019
1593629100	6	0.001
1593629100	9	0.05
1593630000	2	0.064
1593630000	3	0.0
1593630000	5	0.052
1593630000	6	0.001
1593630000	9	0.033
1593630900	2	0.038
1593630900	3	0.0
1593630900	5	0.013
1593630900	6	0.003
1593630900	9	0.04
1593631800	2	0.051
1593631800	3	0.0
1593631800	5	0.018
1593631800	6	0.005
1593631800	9	0.054
1593632700	2	0.051
1593632700	3	0.0
1593632700	5	0.012
1593632700	6	0.006
1593632700	9	0.005
1593633600	2	0.085
1593633600	3	0.0
1593633600	5	0.042
1593633600	6	0.006
1593633600	9	0.027
1593634500	2	0.253
1593634500	3	0.0
1593634500	5	0.003
1593634500	6	0.013
1593634500	9	0.0
1593635400	2	0.321
1593635400	3	0.0
1593635400	5	0.015
1593635400	6	0.005
1593635400	9	0.003
1593636300	2	0.312
1593636300	3	0.0
1593636300	5	0.002
1593636300	6	0.005
1593636300	9	0.069
1593637200	2	0.319
1593637200	3	0.033
1593637200	5	0.029
1593637200	6	0.006
1593637200	9	0.0
1593638100	2	0.319
1593638100	3	0.038
1593638100	5	0.01
1593638100	6	0.016
1593638100	9	0.005
1593639000	2	0.318
1593639000	3	0.037
1593639000	5	0.001
1593639000	6	0.047
1593639000	9	0.023
1593639900	2	0.298
1593639900	3	0.037
1593639900	5	0.044
1593639900	6	0.045
1593639900	9	0.01
1593640800	2	0.178
1593640800	3	0.037
1593640800	5	0.06
1593640800	6	0.046
1593640800	9	0.042
1593641700	2	0.251
1593641700	3	0.036
1593641700	5	0.041
1593641700	6	0.046
1593641700	9	0.037
1593642600	2	0.244
1593642600	3	0.038
1593642600	5	0.037
1593642600	6	0.042
1593642600	9	0.022
1593643500	2	0.254
1593643500	3	0.036
1593643500	5	0.091
1593643500	6	0.009
1593643500	9	0.035
1593644400	2	0.258
1593644400	3	0.036
1593644400	5	1.033
1593644400	6	0.009
1593644400	9	0.05
1593645300	2	0.248
1593645300	3	0.036
1593645300	5	0.15
1593645300	6	0.007
1593645300	9	0.008
1593646200	2	0.256
1593646200	3	0.036
1593646200	5	1.172
1593646200	6	0.007
1593646200	9	0.032
1593647100	2	0.26
1593647100	3	0.038
1593647100	5	0.067
1593647100	6	0.007
1593647100	9	0.006
1593648000	2	0.25
1593648000	3	0.037
1593648000	5	0.088
1593648000	6	0.005
1593648000	9	0.019
1593648900	2	0.259
1593648900	3	0.038
1593648900	5	0.057
1593648900	6	0.004
1593648900	9	0.02
1593649800	2	0.263
1593649800	3	0.038
1593649800	5	0.052
1593649800	6	0.005
1593649800	9	0.006
1593650700	2	0.252
1593650700	3	0.038
1593650700	5	0.159
1593650700	6	0.005
1593650700	9	0.025
1593651600	2	0.263
1593651600	3	0.038
1593651600	5	0.082
1593651600	6	0.004
1593651600	9	0.014
1593652500	2	0.268
1593652500	3	0.038
1593652500	5	0.084
1593652500	6	0.005
1593652500	9	0.034
1593653400	2	0.206
1593653400	3	0.038
1593653400	5	0.062
1593653400	6	0.005
1593653400	9	0.047
1593654300	2	0.183
1593654300	3	0.038
1593654300	5	0.004
1593654300	6	0.004
1593654300	9	0.009
1593655200	2	0.029
1593655200	3	0.038
1593655200	5	0.017
1593655200	6	0.005
1593655200	9	0.006
1593656100	2	0.015
1593656100	3	0.037
1593656100	5	0.011
1593656100	6	0.005
1593656100	9	0.034
1593657000	2	0.028
1593657000	3	0.038
1593657000	5	0.001
1593657000	6	0.008
1593657000	9	0.005
1593657900	2	0.017
1593657900	3	0.039
1593657900	5	0.002
1593657900	6	0.009
1593657900	9	0.006
1593658800	2	0.009
1593658800	3	0.037
1593658800	5	0.01
1593658800	6	0.009
1593658800	9	0.033
1593659700	2	0.02
1593659700	3	0.039
1593659700	5	0.017
1593659700	6	0.006
1593659700	9	0.006
1593660600	2	0.012
1593660600	3	0.037
1593660600	5	0.001
1593660600	6	0.008
1593660600	9	0.003
1593661500	2	0.013
1593661500	3	0.039
1593661500	5	0.002
1593661500	6	0.043
1593661500	9	0.058
1593662400	2	0.02
1593662400	3	0.039
1593662400	5	0.003
1593662400	6	0.04
1593662400	9	0.016
1593663300	2	0.007
1593663300	3	0.038
1593663300	5	0.022
1593663300	6	0.039
1593663300	9	0.0
1593664200	2	0.018
1593664200	3	0.039
1593664200	5	0.001
1593664200	6	0.038
1593664200	9	0.023
1593665100	2	0.019
1593665100	3	0.039
1593665100	5	0.002
1593665100	6	0.037
1593665100	9	0.005
1593666000	2	0.006
1593666000	3	0.039
1593666000	5	0.001
1593666000	6	0.036
1593666000	9	0.0
1593666900	2	0.019
1593666900	3	0.039
1593666900	5	0.025
1593666900	6	0.018
1593666900	9	0.019
1593667800	2	0.016
1593667800	3	0.039
1593667800	5	0.002
1593667800	6	0.002
1593667800	9	0.008
1593668700	2	0.009
1593668700	3	0.039
1593668700	5	0.001
1593668700	6	0.001
1593668700	9	0.0
1593669600	2	0.019
1593669600	3	0.039
1593669600	5	0.002
1593669600	6	0.001
1593669600	9	0.009
1593670500	2	0.011
1593670500	3	0.039
1593670500	5	0.023
1593670500	6	0.0
1593670500	9	0.029
1593671400	2	0.014
1593671400	3	0.039
1593671400	5	0.003
1593671400	6	0.001
1593671400	9	0.035
1593672300	2	0.019
1593672300	3	0.038
1593672300	5	0.002
1593672300	6	0.0
1593672300	9	0.003
1593673200	2	0.005
1593673200	3	0.037
1593673200	5	0.001
1593673200	6	0.0
1593673200	9	0.025
1593674100	2	0.019
1593674100	3	0.037
1593674100	5	0.01
1593674100	6	0.001
1593674100	9	0.0
1593675000	2	0.019
1593675000	3	0.037
1593675000	5	0.016
1593675000	6	0.0
1593675000	9	0.0
1593675900	2	0.006
1593675900	3	0.037
1593675900	5	0.001
1593675900	6	0.0
1593675900	9	0.027
1593676800	2	0.018
1593676800	3	0.037
1593676800	5	0.007
1593676800	6	0.001
1593676800	9	0.0
1593677700	2	0.013
1593677700	3	0.037
1593677700	5	0.006
1593677700	6	0.0
1593677700	9	0.0
1593678600	2	0.012
1593678600	3	0.036
1593678600	5	0.064
1593678600	6	0.0
1593678600	9	0.028
1593679500	2	0.018
1593679500	3	0.037
1593679500	5	0.061
1593679500	6	0.001
1593679500	9	0.0
1593680400	2	0.007
1593680400	3	0.037
1593680400	5	0.015
1593680400	6	0.0
1593680400	9	0.013
1593681300	2	0.017
1593681300	3	0.038
1593681300	5	0.006
1593681300	6	0.0
1593681300	9	0.042
1593682200	2	0.019
1593682200	3	0.037
1593682200	5	0.031
1593682200	6	0.0
1593682200	9	0.018
1593683100	2	0.006
1593683100	3	0.037
1593683100	5	0.006
1593683100	6	0.001
1593683100	9	0.0
1593684000	2	0.018
1593684000	3	0.037
1593684000	5	0.007
1593684000	6	0.0
1593684000	9	0.0
1593684900	2	0.014
1593684900	3	0.037
1593684900	5	0.006
1593684900	6	0.001
1593684900	9	0.028
1593685800	2	0.011
1593685800	3	0.037
1593685800	5	0.017
1593685800	6	0.001
1593685800	9	0.0
1593686700	2	0.018
1593686700	3	0.037
1593686700	5	0.014
1593686700	6	0.002
1593686700	9	0.0
1593687600	2	0.007
1593687600	3	0.007
1593687600	5	0.007
1593687600	6	0.001
1593687600	9	0.017
1593688500	2	0.018
1593688500	3	0.0
1593688500	5	0.006
1593688500	6	0.002
1593688500	9	0.011
1593689400	2	0.033
1593689400	3	0.0
1593689400	5	0.019
1593689400	6	0.001
1593689400	9	0.297
1593690300	2	0.036
1593690300	3	0.0
1593690300	5	0.014
1593690300	6	0.002
1593690300	9	0.451
1593691200	2	0.155
1593691200	3	0.0
1593691200	5	0.018
1593691200	6	0.007
1593691200	9	0.25
1593692100	2	0.185
1593692100	3	0.0
1593692100	5	0.048
1593692100	6	0.009
1593692100	9	0.025
1593693000	2	0.184
1593693000	3	0.0
1593693000	5	0.013
1593693000	6	0.009
1593693000	9	0.098
1593693900	2	0.19
1593693900	3	0.0
1593693900	5	0.023
1593693900	6	0.008
1593693900	9	0.034
1593694800	2	0.177
1593694800	3	0.0
1593694800	5	0.004
1593694800	6	0.027
1593694800	9	0.005
1593695700	2	0.189
1593695700	3	0.0
1593695700	5	0.002
1593695700	6	0.047
1593695700	9	0.005
1593696600	2	0.186
1593696600	3	0.0
1593696600	5	0.001
1593696600	6	0.039
1593696600	9	0.033
1593697500	2	0.175
1593697500	3	0.0
1593697500	5	0.004
1593697500	6	0.036
1593697500	9	0.11
1593698400	2	0.193
1593698400	3	0.0
1593698400	5	0.019
1593698400	6	0.005
1593698400	9	0.002
1593699300	2	0.073
1593699300	3	0.0
1593699300	5	0.002
1593699300	6	0.001
1593699300	9	0.137
1593700200	2	0.01
1593700200	3	0.0
1593700200	5	0.001
1593700200	6	0.001
1593700200	9	0.0
1593701100	2	0.018
1593701100	3	0.0
1593701100	5	0.013
1593701100	6	0.002
1593701100	9	0.0
1593702000	2	0.004
1593702000	3	0.0
1593702000	5	0.016
1593702000	6	0.001
1593702000	9	0.048
1593702900	2	0.019
1593702900	3	0.0
1593702900	5	0.004
1593702900	6	0.001
1593702900	9	0.027
1593703800	2	0.045
1593703800	3	0.0
1593703800	5	0.005
1593703800	6	0.001
1593703800	9	0.115
1593704700	2	0.052
1593704700	3	0.0
1593704700	5	0.004
1593704700	6	0.001
1593704700	9	0.021
1593705600	2	0.085
1593705600	3	0.0
1593705600	5	0.025
1593705600	6	0.001
1593705600	9	0.011
1593706500	2	0.084
1593706500	3	0.0
1593706500	5	0.004
1593706500	6	0.001
1593706500	9	0.014
1593707400	2	0.05
1593707400	3	0.0
1593707400	5	0.002
1593707400	6	0.001
1593707400	9	0.045
1593708300	2	0.086
1593708300	3	0.0
1593708300	5	0.002
1593708300	6	0.001
1593708300	9	0.026
1593709200	2	0.085
1593709200	3	0.0
1593709200	5	0.02
1593709200	6	0.003
1593709200	9	0.016
1593710100	2	0.058
1593710100	3	0.0
1593710100	5	0.002
1593710100	6	0.012
1593710100	9	0.044
1593711000	2	0.045
1593711000	3	0.0
1593711000	5	0.002
1593711000	6	0.004
1593711000	9	0.015
1593711900	2	0.045
1593711900	3	0.0
1593711900	5	0.012
1593711900	6	0.003
1593711900	9	0.048
1593712800	2	0.033
1593712800	3	0.0
1593712800	5	0.012
1593712800	6	0.003
1593712800	9	0.06
1593713700	2	0.045
1593713700	3	0.0
1593713700	5	0.002
1593713700	6	0.003
1593713700	9	0.017
1593714600	2	0.045
1593714600	3	0.0
1593714600	5	0.002
1593714600	6	0.008
1593714600	9	0.016
1593715500	2	0.033
1593715500	3	0.0
1593715500	5	0.028
1593715500	6	0.022
1593715500	9	0.044
1593716400	2	0.045
1593716400	3	0.0
1593716400	5	0.002
1593716400	6	0.022
1593716400	9	0.016
1593717300	2	0.044
1593717300	3	0.0
1593717300	5	0.002
1593717300	6	0.022
1593717300	9	0.016
1593718200	2	0.036
1593718200	3	0.0
1593718200	5	0.002
1593718200	6	0.022
1593718200	9	0.048
1593719100	2	0.051
1593719100	3	0.0
1593719100	5	0.025
1593719100	6	0.022
1593719100	9	0.015
1593720000	2	0.054
1593720000	3	0.0
1593720000	5	0.004
1593720000	6	0.023
1593720000	9	0.015
1593720900	2	0.288
1593720900	3	0.0
1593720900	5	0.008
1593720900	6	0.024
1593720900	9	0.055
1593721800	2	0.312
1593721800	3	0.0
1593721800	5	0.028
1593721800	6	0.024
1593721800	9	0.046
1593722700	2	0.324
1593722700	3	0.007
1593722700	5	0.041
1593722700	6	0.02
1593722700	9	0.015
1593723600	2	0.327
1593723600	3	0.037
1593723600	5	0.05
1593723600	6	0.003
1593723600	9	0.052
1593724500	2	0.318
1593724500	3	0.038
1593724500	5	0.046
1593724500	6	0.005
1593724500	9	0.028
1593725400	2	0.345
1593725400	3	0.037
1593725400	5	0.054
1593725400	6	0.005
1593725400	9	0.028
1593726300	2	0.268
1593726300	3	0.037
1593726300	5	0.074
1593726300	6	0.009
1593726300	9	0.057
1593727200	2	0.248
1593727200	3	0.037
1593727200	5	0.072
1593727200	6	0.01
1593727200	9	0.028
1593728100	2	0.272
1593728100	3	0.037
1593728100	5	0.071
1593728100	6	0.007
1593728100	9	0.194
1593729000	2	0.28
1593729000	3	0.037
1593729000	5	0.068
1593729000	6	0.007
1593729000	9	0.484
1593729900	2	0.263
1593729900	3	0.037
1593729900	5	0.084
1593729900	6	0.007
1593729900	9	0.408
1593730800	2	0.268
1593730800	3	0.036
1593730800	5	0.789
1593730800	6	0.007
1593730800	9	0.045
1593796500	2	0.039
1593796500	3	0.0
1593796500	5	0.027
1593796500	6	0.004
1593796500	9	0.038
1593797400	2	0.047
1593797400	3	0.0
1593797400	5	0.035
1593797400	6	0.051
1593797400	9	0.017
1593798300	2	0.038
1593798300	3	0.0
1593798300	5	0.018
1593798300	6	0.038
1593798300	9	0.016
1593799200	2	0.023
1593799200	3	0.0
1593799200	5	0.024
1593799200	6	0.015
1593799200	9	0.026
1593800100	2	0.05
1593800100	3	0.0
1593800100	5	0.003
1593800100	6	0.01
1593800100	9	0.034
1593801000	2	0.063
1593801000	3	0.0
1593801000	5	0.012
1593801000	6	0.046
1593801000	9	0.017
1593801900	2	0.034
1593801900	3	0.0
1593801900	5	0.015
1593801900	6	0.043
1593801900	9	0.016
1593802800	2	0.047
1593802800	3	0.0
1593802800	5	0.025
1593802800	6	0.042
1593802800	9	0.06
1593803700	2	0.048
1593803700	3	0.0
1593803700	5	0.002
1593803700	6	0.04
1593803700	9	0.047
1593804600	2	0.034
1593804600	3	0.0
1593804600	5	0.011
1593804600	6	0.044
1593804600	9	0.016
1593805500	2	0.051
1593805500	3	0.0
1593805500	5	0.009
1593805500	6	0.039
1593805500	9	0.043
1593806400	2	0.049
1593806400	3	0.0
1593806400	5	0.029
1593806400	6	0.038
1593806400	9	0.015
1593807300	2	0.036
1593807300	3	0.0
1593807300	5	0.016
1593807300	6	0.016
1593807300	9	0.015
1593808200	2	0.05
1593808200	3	0.0
1593808200	5	0.033
1593808200	6	0.001
1593808200	9	0.045
1593809100	2	0.048
1593809100	3	0.0
1593809100	5	0.008
1593809100	6	0.001
1593809100	9	0.025
1593810000	2	0.159
1593810000	3	0.009
1593810000	5	0.037
1593810000	6	0.003
1593810000	9	0.015
1593810900	2	0.334
1593810900	3	0.038
1593810900	5	0.019
1593810900	6	0.005
1593810900	9	0.048
1593811800	2	0.338
1593811800	3	0.038
1593811800	5	0.041
1593811800	6	0.005
1593811800	9	0.061
1593812700	2	0.291
1593812700	3	0.038
1593812700	5	0.044
1593812700	6	0.007
1593812700	9	0.008
1593813600	2	0.291
1593813600	3	0.038
1593813600	5	0.068
1593813600	6	0.01
1593813600	9	0.036
1593814500	2	0.267
1593814500	3	0.037
1593814500	5	0.051
1593814500	6	0.006
1593814500	9	0.008
1593815400	2	0.258
1593815400	3	0.038
1593815400	5	0.045
1593815400	6	0.007
1593815400	9	0.008
1593816300	2	0.272
1593816300	3	0.037
1593816300	5	0.061
1593816300	6	0.006
1593816300	9	0.035
1593817200	2	0.267
1593817200	3	0.037
1593817200	5	0.073
1593817200	6	0.007
1593817200	9	0.008
1593818100	2	0.288
1593818100	3	0.037
1593818100	5	0.056
1593818100	6	0.006
1593818100	9	0.008
1593819000	2	0.238
1593819000	3	0.037
1593819000	5	0.069
1593819000	6	0.007
1593819000	9	0.036
1593819900	2	0.225
1593819900	3	0.037
1593819900	5	0.055
1593819900	6	0.007
1593819900	9	0.031
1593820800	2	0.24
1593820800	3	0.037
1593820800	5	0.064
1593820800	6	0.005
1593820800	9	0.031
1593821700	2	0.239
1593821700	3	0.037
1593821700	5	0.065
1593821700	6	0.005
1593821700	9	0.041
1593822600	2	0.083
1593822600	3	0.037
1593822600	5	0.081
1593822600	6	0.004
1593822600	9	0.016
1593823500	2	0.035
1593823500	3	0.037
1593823500	5	0.057
1593823500	6	0.004
1593823500	9	0.006
1593824400	2	0.025
1593824400	3	0.037
1593824400	5	0.104
1593824400	6	0.004
1593824400	9	0.027
1593825300	2	0.022
1593825300	3	0.037
1593825300	5	0.333
1593825300	6	0.004
1593825300	9	0.013
1593826200	2	0.031
1593826200	3	0.037
1593826200	5	0.333
1593826200	6	0.004
1593826200	9	0.006
1593827100	2	0.028
1593827100	3	0.037
1593827100	5	1.094
1593827100	6	0.004
1593827100	9	0.018
1593828000	2	0.018
1593828000	3	0.037
1593828000	5	0.065
1593828000	6	0.005
1593828000	9	0.022
1593828900	2	0.021
1593828900	3	0.038
1593828900	5	0.084
1593828900	6	0.004
1593828900	9	0.02
1593829800	2	0.017
1593829800	3	0.037
1593829800	5	0.045
1593829800	6	0.004
1593829800	9	0.037
1593830700	2	0.006
1593830700	3	0.037
1593830700	5	0.055
1593830700	6	0.004
1593830700	9	0.034
1593831600	2	0.018
1593831600	3	0.037
1593831600	5	0.044
1593831600	6	0.004
1593831600	9	0.006
1593832500	2	0.017
1593832500	3	0.037
1593832500	5	0.041
1593832500	6	0.01
1593832500	9	0.006
1593833400	2	0.006
1593833400	3	0.037
1593833400	5	0.023
1593833400	6	0.026
1593833400	9	0.033
1593834300	2	0.018
1593834300	3	0.038
1593834300	5	0.025
1593834300	6	0.0
1593834300	9	0.006
1593835200	2	0.015
1593835200	3	0.037
1593835200	5	0.043
1593835200	6	0.001
1593835200	9	0.006
1593836100	2	0.008
1593836100	3	0.037
1593836100	5	0.022
1593836100	6	0.001
1593836100	9	0.01
1593837000	2	0.018
1593837000	3	0.038
1593837000	5	0.043
1593837000	6	0.0
1593837000	9	0.025
1593837900	2	0.012
1593837900	3	0.037
1593837900	5	0.008
1593837900	6	0.001
1593837900	9	0.0
1593838800	2	0.01
1593838800	3	0.037
1593838800	5	0.021
1593838800	6	0.001
1593838800	9	0.026
1593839700	2	0.017
1593839700	3	0.037
1593839700	5	0.009
1593839700	6	0.001
1593839700	9	0.047
1593840600	2	0.01
1593840600	3	0.037
1593840600	5	0.015
1593840600	6	0.001
1593840600	9	0.0
1593841500	2	0.013
1593841500	3	0.037
1593841500	5	0.022
1593841500	6	0.001
1593841500	9	0.0
1593842400	2	0.017
1593842400	3	0.037
1593842400	5	0.002
1593842400	6	0.001
1593842400	9	0.013
1593843300	2	0.007
1593843300	3	0.037
1593843300	5	0.003
1593843300	6	0.0
1593843300	9	0.015
1593844200	2	0.015
1593844200	3	0.037
1593844200	5	0.009
1593844200	6	0.0
1593844200	9	0.0
1593845100	2	0.018
1593845100	3	0.037
1593845100	5	0.024
1593845100	6	0.0
1593845100	9	0.0
1593846000	2	0.004
1593846000	3	0.038
1593846000	5	0.01
1593846000	6	0.0
1593846000	9	0.028
1593846900	2	0.017
1593846900	3	0.037
1593846900	5	0.002
1593846900	6	0.0
1593846900	9	0.0
1593847800	2	0.017
1593847800	3	0.037
1593847800	5	0.002
1593847800	6	0.0
1593847800	9	0.0
1593848700	2	0.005
1593848700	3	0.038
1593848700	5	0.012
1593848700	6	0.0
1593848700	9	0.026
1593849600	2	0.027
1593849600	3	0.038
1593849600	5	0.019
1593849600	6	0.0
1593849600	9	0.048
1593850500	2	0.196
1593850500	3	0.037
1593850500	5	0.001
1593850500	6	0.0
1593850500	9	0.0
1593851400	2	0.189
1593851400	3	0.038
1593851400	5	0.025
1593851400	6	0.0
1593851400	9	0.0
1593852300	2	0.195
1593852300	3	0.037
1593852300	5	0.073
1593852300	6	0.0
1593852300	9	0.026
1593853200	2	0.188
1593853200	3	0.038
1593853200	5	0.049
1593853200	6	0.0
1593853200	9	0.002
1593854100	2	0.188
1593854100	3	0.037
1593854100	5	0.004
1593854100	6	0.0
1593854100	9	0.0
1593855000	2	0.194
1593855000	3	0.038
1593855000	5	0.002
1593855000	6	0.0
1593855000	9	0.0
1593855900	2	0.185
1593855900	3	0.037
1593855900	5	0.01
1593855900	6	0.0
1593855900	9	0.028
1593856800	2	0.194
1593856800	3	0.038
1593856800	5	0.021
1593856800	6	0.0
1593856800	9	0.0
1593857700	2	0.195
1593857700	3	0.037
1593857700	5	0.001
1593857700	6	0.0
1593857700	9	0.0
1593858600	2	0.138
1593858600	3	0.037
1593858600	5	0.011
1593858600	6	0.0
1593858600	9	0.001
1593859500	2	0.017
1593859500	3	0.037
1593859500	5	0.002
1593859500	6	0.001
1593859500	9	0.065
1593860400	2	0.015
1593860400	3	0.004
1593860400	5	0.021
1593860400	6	0.001
1593860400	9	0.009
1593861300	2	0.005
1593861300	3	0.0
1593861300	5	0.023
1593861300	6	0.004
1593861300	9	0.0
1593862200	2	0.066
1593862200	3	0.0
1593862200	5	0.015
1593862200	6	0.004
1593862200	9	0.014
1593863100	2	0.011
1593863100	3	0.0
1593863100	5	0.005
1593863100	6	0.005
1593863100	9	0.014
1593864000	2	0.01
1593864000	3	0.0
1593864000	5	0.077
1593864000	6	0.006
1593864000	9	0.226
1593864900	2	0.017
1593864900	3	0.0
1593864900	5	0.017
1593864900	6	0.006
1593864900	9	0.453
1593865800	2	0.006
1593865800	3	0.0
1593865800	5	0.001
1593865800	6	0.0
1593865800	9	0.431
1593866700	2	0.015
1593866700	3	0.0
1593866700	5	0.011
1593866700	6	0.0
1593866700	9	0.0
1593867600	2	0.016
1593867600	3	0.0
1593867600	5	0.02
1593867600	6	0.0
1593867600	9	0.105
1593868500	2	0.004
1593868500	3	0.0
1593868500	5	0.007
1593868500	6	0.0
1593868500	9	0.005
1593869400	2	0.017
1593869400	3	0.0
1593869400	5	0.018
1593869400	6	0.0
1593869400	9	0.025
1593870300	2	0.014
1593870300	3	0.0
1593870300	5	0.001
1593870300	6	0.0
1593870300	9	0.137
1593871200	2	0.043
1593871200	3	0.0
1593871200	5	0.011
1593871200	6	0.0
1593871200	9	0.025
1593872100	2	0.056
1593872100	3	0.0
1593872100	5	0.024
1593872100	6	0.0
1593872100	9	0.029
1593873000	2	0.041
1593873000	3	0.0
1593873000	5	0.001
1593873000	6	0.0
1593873000	9	0.0
1593873900	2	0.037
1593873900	3	0.0
1593873900	5	0.011
1593873900	6	0.0
1593873900	9	0.0
1593874800	2	0.059
1593874800	3	0.0
1593874800	5	0.001
1593874800	6	0.0
1593874800	9	0.006
1593875700	2	0.058
1593875700	3	0.0
1593875700	5	0.037
1593875700	6	0.0
1593875700	9	0.025
1593876600	2	0.062
1593876600	3	0.0
1593876600	5	0.034
1593876600	6	0.0
1593876600	9	0.035
1593877500	2	0.084
1593877500	3	0.0
1593877500	5	0.037
1593877500	6	0.0
1593877500	9	0.083
1593878400	2	0.072
1593878400	3	0.0
1593878400	5	0.001
1593878400	6	0.025
1593878400	9	0.029
1593879300	2	0.066
1593879300	3	0.0
1593879300	5	0.039
1593879300	6	0.044
1593879300	9	0.004
1593880200	2	0.044
1593880200	3	0.0
1593880200	5	0.013
1593880200	6	0.043
1593880200	9	0.043
1593881100	2	0.034
1593881100	3	0.0
1593881100	5	0.138
1593881100	6	0.042
1593881100	9	0.007
1593882000	2	0.045
1593882000	3	0.0
1593882000	5	0.016
1593882000	6	0.018
1593882000	9	0.021
1593882900	2	0.041
1593882900	3	0.0
1593882900	5	0.025
1593882900	6	0.003
1593882900	9	0.0
1593883800	2	0.036
1593883800	3	0.0
1593883800	5	0.011
1593883800	6	0.009
1593883800	9	0.0
1593884700	2	0.045
1593884700	3	0.0
1593884700	5	0.002
1593884700	6	0.003
1593884700	9	0.028
1593885600	2	0.038
1593885600	3	0.0
1593885600	5	0.018
1593885600	6	0.003
1593885600	9	0.0
1593886500	2	0.014
1593886500	3	0.0
1593886500	5	0.019
1593886500	6	0.003
1593886500	9	0.0
1593887400	2	0.019
1593887400	3	0.0
1593887400	5	0.01
1593887400	6	0.002
1593887400	9	0.013
1593888300	2	0.009
1593888300	3	0.0
1593888300	5	0.003
1593888300	6	0.002
1593888300	9	0.015
1593889200	2	0.016
1593889200	3	0.0
1593889200	5	0.019
1593889200	6	0.003
1593889200	9	0.021
1593890100	2	0.019
1593890100	3	0.0
1593890100	5	0.016
1593890100	6	0.002
1593890100	9	0.025
1593891000	2	0.007
1593891000	3	0.0
1593891000	5	0.001
1593891000	6	0.0
1593891000	9	0.055
1593891900	2	0.038
1593891900	3	0.0
1593891900	5	0.011
1593891900	6	0.0
1593891900	9	0.104
1593892800	2	0.047
1593892800	3	0.0
1593892800	5	0.026
1593892800	6	0.0
1593892800	9	0.0
1593893700	2	0.182
1593893700	3	0.0
1593893700	5	0.014
1593893700	6	0.006
1593893700	9	0.021
1593894600	2	0.394
1593894600	3	0.0
1593894600	5	0.005
1593894600	6	0.011
1593894600	9	0.007
1593895500	2	0.344
1593895500	3	0.0
1593895500	5	0.009
1593895500	6	0.21
1593895500	9	0.0
1593896400	2	0.339
1593896400	3	0.015
1593896400	5	0.029
1593896400	6	0.011
1593896400	9	0.0
1593897300	2	0.318
1593897300	3	0.038
1593897300	5	0.027
1593897300	6	0.015
1593897300	9	0.035
1593898200	2	0.298
1593898200	3	0.038
1593898200	5	0.052
1593898200	6	0.07
1593898200	9	0.028
1593899100	2	0.111
1593899100	3	0.038
1593899100	5	0.043
1593899100	6	0.046
1593899100	9	0.036
1593900000	2	0.254
1593900000	3	0.038
1593900000	5	0.103
1593900000	6	0.035
1593900000	9	0.049
1593900900	2	0.222
1593900900	3	0.039
1593900900	5	0.096
1593900900	6	0.007
1593900900	9	0.024
1593901800	2	0.168
1593901800	3	0.038
1593901800	5	0.105
1593901800	6	0.006
1593901800	9	0.023
1593902700	2	0.204
1593902700	3	0.038
1593902700	5	0.455
1593902700	6	0.007
1593902700	9	0.053
1593903600	2	0.193
1593903600	3	0.039
1593903600	5	0.481
1593903600	6	0.007
1593903600	9	0.03
1593904500	2	0.162
1593904500	3	0.038
1593904500	5	1.249
1593904500	6	0.006
1593904500	9	0.049
1593905400	2	0.177
1593905400	3	0.038
1593905400	5	0.346
1593905400	6	0.007
1593905400	9	0.045
1593906300	2	0.203
1593906300	3	0.039
1593906300	5	0.103
1593906300	6	0.005
1593906300	9	0.028
1593907200	2	0.178
1593907200	3	0.038
1593907200	5	0.079
1593907200	6	0.004
1593907200	9	0.093
1593908100	2	0.175
1593908100	3	0.038
1593908100	5	0.057
1593908100	6	0.004
1593908100	9	0.038
1593909000	2	0.174
1593909000	3	0.038
1593909000	5	0.053
1593909000	6	0.004
1593909000	9	0.032
1593909900	2	0.072
1593909900	3	0.039
1593909900	5	0.045
1593909900	6	0.004
1593909900	9	0.056
1593910800	2	0.029
1593910800	3	0.038
1593910800	5	0.063
1593910800	6	0.004
1593910800	9	0.031
1593911700	2	0.026
1593911700	3	0.039
1593911700	5	0.063
1593911700	6	0.004
1593911700	9	0.378
1593912600	2	0.018
1593912600	3	0.037
1593912600	5	0.055
1593912600	6	0.004
1593912600	9	0.496
1593913500	2	0.03
1593913500	3	0.038
1593913500	5	0.047
1593913500	6	0.005
1593913500	9	0.511
1593914400	2	0.025
1593914400	3	0.038
1593914400	5	0.05
1593914400	6	0.004
1593914400	9	0.499
1593915300	2	0.051
1593915300	3	0.038
1593915300	5	0.066
1593915300	6	0.004
1593915300	9	0.08
1593916200	2	0.052
1593916200	3	0.037
1593916200	5	0.014
1593916200	6	0.004
1593916200	9	0.051
1593917100	2	0.029
1593917100	3	0.039
1593917100	5	0.023
1593917100	6	0.004
1593917100	9	0.0
1593918000	2	0.042
1593918000	3	0.038
1593918000	5	0.003
1593918000	6	0.004
1593918000	9	0.007
1593918900	2	0.035
1593918900	3	0.038
1593918900	5	0.034
1593918900	6	0.004
1593918900	9	0.021
1593919800	2	0.015
1593919800	3	0.039
1593919800	5	0.011
1593919800	6	0.005
1593919800	9	0.0
1593920700	2	0.015
1593920700	3	0.038
1593920700	5	0.014
1593920700	6	0.045
1593920700	9	0.014
1593921600	2	0.022
1593921600	3	0.038
1593921600	5	0.005
1593921600	6	0.044
1593921600	9	0.014
1593922500	2	0.017
1593922500	3	0.038
1593922500	5	0.012
1593922500	6	0.038
1593922500	9	0.0
1593923400	2	0.01
1593923400	3	0.038
1593923400	5	0.033
1593923400	6	0.005
1593923400	9	0.021
1593924300	2	0.021
1593924300	3	0.038
1593924300	5	0.004
1593924300	6	0.004
1593924300	9	0.051
1593925200	2	0.019
1593925200	3	0.039
1593925200	5	0.015
1593925200	6	0.004
1593925200	9	0.0
1593926100	2	0.007
1593926100	3	0.038
1593926100	5	0.003
1593926100	6	0.004
1593926100	9	0.015
1593927000	2	0.02
1593927000	3	0.039
1593927000	5	0.028
1593927000	6	0.004
1593927000	9	0.013
1593927900	2	0.02
1593927900	3	0.039
1593927900	5	0.011
1593927900	6	0.004
1593927900	9	0.0
1593928800	2	0.005
1593928800	3	0.039
1593928800	5	0.003
1593928800	6	0.005
1593928800	9	0.008
1593929700	2	0.017
1593929700	3	0.038
1593929700	5	0.016
1593929700	6	0.004
1593929700	9	0.019
1593930600	2	0.018
1593930600	3	0.039
1593930600	5	0.022
1593930600	6	0.004
1593930600	9	0.0
1593931500	2	0.004
1593931500	3	0.039
1593931500	5	0.007
1593931500	6	0.004
1593931500	9	0.002
1593932400	2	0.018
1593932400	3	0.038
1593932400	5	0.011
1593932400	6	0.005
1593932400	9	0.056
1593933300	2	0.017
1593933300	3	0.039
1593933300	5	0.023
1593933300	6	0.004
1593933300	9	0.015
1593934200	2	0.005
1593934200	3	0.038
1593934200	5	0.029
1593934200	6	0.004
1593934200	9	0.0
1593935100	2	0.018
1593935100	3	0.039
1593935100	5	0.003
1593935100	6	0.004
1593935100	9	0.028
1593936000	2	0.015
1593936000	3	0.038
1593936000	5	0.007
1593936000	6	0.006
1593936000	9	0.0
1593936900	2	0.006
1593936900	3	0.038
1593936900	5	0.011
1593936900	6	0.001
1593936900	9	0.0
1593937800	2	0.018
1593937800	3	0.037
1593937800	5	0.023
1593937800	6	0.001
1593937800	9	0.029
1593938700	2	0.013
1593938700	3	0.038
1593938700	5	0.067
1593938700	6	0.001
1593938700	9	0.0
1593939600	2	0.008
1593939600	3	0.037
1593939600	5	0.027
1593939600	6	0.001
1593939600	9	0.0
1593940500	2	0.017
1593940500	3	0.037
1593940500	5	0.024
1593940500	6	0.0
1593940500	9	0.032
1593941400	2	0.012
1593941400	3	0.038
1593941400	5	0.015
1593941400	6	0.001
1593941400	9	0.042
1593942300	2	0.01
1593942300	3	0.037
1593942300	5	0.003
1593942300	6	0.0
1593942300	9	0.0
1593943200	2	0.018
1593943200	3	0.037
1593943200	5	0.014
1593943200	6	0.0
1593943200	9	0.021
1593944100	2	0.015
1593944100	3	0.037
1593944100	5	0.03
1593944100	6	0.0
1593944100	9	0.007
1593945000	2	0.063
1593945000	3	0.037
1593945000	5	0.003
1593945000	6	0.0
1593945000	9	0.0
1593945900	2	0.074
1593945900	3	0.038
1593945900	5	0.015
1593945900	6	0.0
1593945900	9	0.011
1593946800	2	0.193
1593946800	3	0.004
1593946800	5	0.003
1593946800	6	0.0
1593946800	9	0.279
1593947700	2	0.208
1593947700	3	0.0
1593947700	5	0.032
1593947700	6	0.0
1593947700	9	0.238
1593948600	2	0.209
1593948600	3	0.0
1593948600	5	0.012
1593948600	6	0.009
1593948600	9	0.005
1593949500	2	0.189
1593949500	3	0.0
1593949500	5	0.022
1593949500	6	0.029
1593949500	9	0.051
1593950400	2	0.197
1593950400	3	0.0
1593950400	5	0.077
1593950400	6	0.049
1593950400	9	0.21
1593951300	2	0.196
1593951300	3	0.0
1593951300	5	0.042
1593951300	6	0.047
1593951300	9	0.236
1593952200	2	0.183
1593952200	3	0.0
1593952200	5	0.045
1593952200	6	0.045
1593952200	9	0.549
1593953100	2	0.2
1593953100	3	0.0
1593953100	5	0.039
1593953100	6	0.018
1593953100	9	0.244
1593954000	2	0.196
1593954000	3	0.0
1593954000	5	0.038
1593954000	6	0.007
1593954000	9	0.037
1593954900	2	0.186
1593954900	3	0.0
1593954900	5	0.051
1593954900	6	0.021
1593954900	9	0.059
1593955800	2	0.191
1593955800	3	0.0
1593955800	5	0.05
1593955800	6	0.037
1593955800	9	0.054
1593956700	2	0.015
1593956700	3	0.0
1593956700	5	0.041
1593956700	6	0.027
1593956700	9	0.031
1593957600	2	0.01
1593957600	3	0.0
1593957600	5	0.043
1593957600	6	0.026
1593957600	9	0.004
1593958500	2	0.026
1593958500	3	0.0
1593958500	5	0.102
1593958500	6	0.025
1593958500	9	0.054
1593959400	2	0.023
1593959400	3	0.0
1593959400	5	0.083
1593959400	6	0.003
1593959400	9	0.023
1593960300	2	0.016
1593960300	3	0.0
1593960300	5	0.042
1593960300	6	0.024
1593960300	9	0.007
1593961200	2	0.034
1593961200	3	0.0
1593961200	5	0.041
1593961200	6	0.04
1593961200	9	0.027
1593962100	2	0.046
1593962100	3	0.0
1593962100	5	0.027
1593962100	6	0.038
1593962100	9	0.0
1593963000	2	0.035
1593963000	3	0.0
1593963000	5	0.048
1593963000	6	0.021
1593963000	9	0.025
1593963900	2	0.043
1593963900	3	0.0
1593963900	5	0.018
1593963900	6	0.0
1593963900	9	0.003
1593964800	2	0.047
1593964800	3	0.0
1593964800	5	0.029
1593964800	6	0.0
1593964800	9	0.0
1593965700	2	0.041
1593965700	3	0.0
1593965700	5	0.034
1593965700	6	0.0
1593965700	9	0.028
1593966600	2	0.036
1593966600	3	0.0
1593966600	5	0.029
1593966600	6	0.012
1593966600	9	0.037
1593967500	2	0.046
1593967500	3	0.0
1593967500	5	0.014
1593967500	6	0.023
1593967500	9	0.009
1593968400	2	0.046
1593968400	3	0.0
1593968400	5	0.05
1593968400	6	0.001
1593968400	9	0.028
1593969300	2	0.036
1593969300	3	0.0
1593969300	5	0.034
1593969300	6	0.0
1593969300	9	0.0
1593970200	2	0.042
1593970200	3	0.0
1593970200	5	0.021
1593970200	6	0.0
1593970200	9	0.0
1593971100	2	0.046
1593971100	3	0.0
1593971100	5	0.028
1593971100	6	0.0
1593971100	9	0.028
1593972000	2	0.042
1593972000	3	0.0
1593972000	5	0.039
1593972000	6	0.0
1593972000	9	0.0
1593972900	2	0.035
1593972900	3	0.0
1593972900	5	0.033
1593972900	6	0.0
1593972900	9	0.002
1593973800	2	0.046
1593973800	3	0.0
1593973800	5	0.013
1593973800	6	0.0
1593973800	9	0.028
1593974700	2	0.045
1593974700	3	0.0
1593974700	5	0.03
1593974700	6	0.0
1593974700	9	0.044
1593975600	2	0.036
1593975600	3	0.0
1593975600	5	0.038
1593975600	6	0.001
1593975600	9	0.01
1593976500	2	0.042
1593976500	3	0.0
1593976500	5	0.025
1593976500	6	0.0
1593976500	9	0.018
1593977400	2	0.047
1593977400	3	0.0
1593977400	5	0.012
1593977400	6	0.0
1593977400	9	0.0
1593978300	2	0.043
1593978300	3	0.0
1593978300	5	0.029
1593978300	6	0.0
1593978300	9	0.018
1593979200	2	0.037
1593979200	3	0.0
1593979200	5	0.036
1593979200	6	0.0
1593979200	9	0.01
1593980100	2	0.177
1593980100	3	0.0
1593980100	5	0.024
1593980100	6	0.0
1593980100	9	0.009
1593981000	2	0.339
1593981000	3	0.0
1593981000	5	0.026
1593981000	6	0.001
1593981000	9	0.044
1593981900	2	0.22
1593981900	3	0.0
1593981900	5	0.024
1593981900	6	0.002
1593981900	9	0.033
1593982800	2	0.278
1593982800	3	0.004
1593982800	5	0.049
1593982800	6	0.008
1593982800	9	0.048
1593983700	2	0.263
1593983700	3	0.039
1593983700	5	0.024
1593983700	6	0.021
1593983700	9	0.062
1593984600	2	0.237
1593984600	3	0.038
1593984600	5	0.068
1593984600	6	0.05
1593984600	9	0.033
1593985500	2	0.197
1593985500	3	0.039
1593985500	5	0.051
1593985500	6	0.046
1593985500	9	0.039
1593986400	2	0.244
1593986400	3	0.038
1593986400	5	0.08
1593986400	6	0.046
1593986400	9	0.058
1593987300	2	0.22
1593987300	3	0.039
1593987300	5	0.048
1593987300	6	0.024
1593987300	9	0.034
1593988200	2	0.176
1593988200	3	0.038
1593988200	5	0.042
1593988200	6	0.006
1593988200	9	0.049
1593989100	2	0.203
1593989100	3	0.039
1593989100	5	0.634
1593989100	6	0.007
1593989100	9	0.045
1593990000	2	0.171
1593990000	3	0.038
1593990000	5	0.1
1593990000	6	0.009
1593990000	9	0.052
1593990900	2	0.177
1593990900	3	0.039
1593990900	5	0.084
1593990900	6	0.005
1593990900	9	0.075
1593991800	2	0.016
1593991800	3	0.038
1593991800	5	0.061
1593991800	6	0.004
1593991800	9	0.017
1593992700	2	0.029
1593992700	3	0.039
1593992700	5	0.068
1593992700	6	0.005
1593992700	9	0.007
1593993600	2	0.029
1593993600	3	0.038
1593993600	5	0.085
1593993600	6	0.004
1593993600	9	0.034
1593994500	2	0.016
1593994500	3	0.038
1593994500	5	0.066
1593994500	6	0.004
1593994500	9	0.006
1593995400	2	0.028
1593995400	3	0.039
1593995400	5	0.091
1593995400	6	0.004
1593995400	9	0.006
1593996300	2	0.029
1593996300	3	0.038
1593996300	5	0.093
1593996300	6	0.004
[truncated: 8,000 more rows]
